# Supplementary material
Source: PubMed Central journal article supplement (PMC2963342)

*Supplemental material for:*

**Cpl-7, a Lysozyme Encoded by a Pneumococcal Bacteriophage with a Novel Cell Wall-Binding Motif**

**Noemí Bustamante<sup>‡§</sup>, Nuria E. Campillo<sup>¶</sup>, Ernesto García<sup>§||</sup>, Cristina Gallego<sup>‡§</sup>, Benet Pera<sup>||</sup>, Gregory P. Diakun<sup>\*\*</sup>, José Luis Sáiz<sup>‡§</sup>, Pedro García<sup>§||</sup>, J. Fernando Díaz<sup>||</sup>, and Margarita Menéndez<sup>‡§1</sup>**

*From the <sup>‡</sup>Instituto de Química-Física Rocasolano, Consejo Superior de Investigaciones Científicas, Serrano 119, 28006, Madrid, Spain, the <sup>§</sup>CIBER de Enfermedades Respiratorias (CIBERES), the <sup>¶</sup>Instituto de Química Médica, Consejo Superior de Investigaciones Científicas, Juan de la Cierva 3, 28006, Madrid, Spain, the <sup>||</sup>Centro de Investigaciones Biológicas, Consejo Superior de Investigaciones Científicas, Ramiro de Maeztu 9, 28040, Madrid, Spain, and the <sup>\*\*</sup>CCLRC Daresbury Laboratory, Warrington WA4 4AD, United Kingdom*

Running head: *Cpl-7 pneumococcal phage endolysin*

<sup>1</sup> To whom correspondence should be addressed: Instituto de Química-Física Rocasolano, Consejo Superior de Investigaciones Científicas, Serrano 119, 28006, Madrid, Spain. Tel.: 3491-561-9400; Fax: 3491-564-2431; E-mail: mmenendez@iqfr.csic.es.

Contents:

Supplemental Tables S1

Legends for Supplemental Figures

Supplemental Figure S1

Supplemental Figure S2

**TABLE S1. Bacterial species encoding proteins containing CW\_7 repeats**

| Bacteria or phage (host) <sup>a</sup>                                                                                                                                                 | Strain               | Description (Evidence of phage origin) <sup>b</sup>                                                                                                           | Protein containing CW_7 repeats                 |                                  |
|---------------------------------------------------------------------------------------------------------------------------------------------------------------------------------------|----------------------|---------------------------------------------------------------------------------------------------------------------------------------------------------------|-------------------------------------------------|----------------------------------|
|                                                                                                                                                                                       |                      |                                                                                                                                                               | Accession No. <sup>c</sup>                      | Proposed function <sup>d</sup>   |
| <b>ACTINOBACTERIA</b>                                                                                                                                                                 |                      |                                                                                                                                                               |                                                 |                                  |
| <u>Actinomycetales</u>                                                                                                                                                                |                      |                                                                                                                                                               |                                                 |                                  |
| Gram-positive bacteria with a high G+C content in their DNA                                                                                                                           |                      |                                                                                                                                                               |                                                 |                                  |
| The pattern of 16S rRNA signatures consists of nucleotides at positions 688 : 699 (G-C), 701 (C), 823 : 877 (G-C) and 1060 : 1197 (U-A)                                               |                      |                                                                                                                                                               |                                                 |                                  |
| <i>Corynebacterium jeikeium</i>                                                                                                                                                       | ATCC 43734           | R, A, NSF. Human skin. Opportunistic, nosocomial pathogen (ϕ)                                                                                                 | EEW16061 (1)                                    | NAM-amidase (2)                  |
| <i>Mobiluncus curtisii</i>                                                                                                                                                            | ATCC 43063           | R, An, NSF. Genitourinary tract and rectum. Opportunist pathogen                                                                                              | EEI88064 (2)                                    | NAM-amidase (2)                  |
| <i>Mobiluncus mulieris</i>                                                                                                                                                            | ATCC 35243           | R, An, NSF. Genitourinary tract and rectum. Opportunistic pathogen (ϕ)                                                                                        | EEJ54470 (3)                                    | NAM-amidase (2)                  |
| <i>Propionibacterium acnes</i>                                                                                                                                                        | SK137                | R, An, NSF. Can tolerate oxygen. Oral cavity, large intestine, conjunctiva, skin. Causes acne vulgaris as well as postoperative and device-related infections | ADD99701 (4)                                    | NAM-amidase (2)                  |
| <u>Bifidobacteriales</u>                                                                                                                                                              |                      |                                                                                                                                                               |                                                 |                                  |
| The pattern of 16S rRNA signatures consists of nucleotides at positions 688 : 699 (A-U), 701 (U), 823 : 877 (A-U) and 1060 : 1197 (C-G)                                               |                      |                                                                                                                                                               |                                                 |                                  |
| <i>Bifidobacterium adolescentis</i>                                                                                                                                                   | L2-32                | R, An, NSF. Gastrointestinal tract of adults (ϕ)                                                                                                              | EDN82563 (5)<br>EDN82835 (6)                    | Lysozyme<br>Lysozyme             |
| <i>Bifidobacterium dentium</i>                                                                                                                                                        | ATCC 27678<br>Bd1    | R, An, NSF. Oral cavity. Causes human dental caries (ϕ)                                                                                                       | EDT45852 (7)<br>ADB10077                        | Lysozyme                         |
| <i>Bifidobacterium longum</i>                                                                                                                                                         | DJO10A               | R, An, NSF. Gastrointestinal tract of adults (ϕ)                                                                                                              | ACD98581 (8)                                    | Lysozyme                         |
| <i>Bifidobacterium longum infantis</i>                                                                                                                                                | subsp.<br>ATCC 15697 | R, An, NSF. Gastrointestinal tract of infants (ϕ)                                                                                                             | ACJ52624 (9)                                    | NK <sup>1</sup>                  |
| <i>Bifidobacterium longum longum</i>                                                                                                                                                  | subsp.<br>F8         | R, An, NSF. Gastrointestinal tract of adults (ϕ)                                                                                                              | ACJ52650 (10)<br>ACJ52906 (11)<br>CBK71086 (12) | Lysozyme<br>Lysozyme<br>Lysozyme |
| <u>Coriobacteriales</u>                                                                                                                                                               |                      |                                                                                                                                                               |                                                 |                                  |
| The pattern of 16S rRNA signatures consists of nucleotides at positions 242 : 284 (C-G), 291 : 309 (C-G), 316 : 337 (U-G), 819 (A), 952 : 1229 (U-A) and 1115 : 1185 (C-G)            |                      |                                                                                                                                                               |                                                 |                                  |
| <i>Collinsella intestinalis</i>                                                                                                                                                       | DSM 13280            | R, An, NSF. Human intestine (ϕ)                                                                                                                               | EEP44864 (13)                                   | Lysozyme                         |
| <i>Collinsella stercoris</i>                                                                                                                                                          | DSM 13279            | R, An, NSF. Human intestine (ϕ)                                                                                                                               | EEA89601 (14)<br>EEA90700 (15)                  | Lysozyme<br>Lysozyme             |
| <b>BACTEROIDETES</b>                                                                                                                                                                  |                      |                                                                                                                                                               |                                                 |                                  |
| The <i>Bacteroidetes</i> species are presently distinguished from other bacteria solely on the basis of their branching patterns in the 16S rRNA trees. Gram-negative, anaerobic rods |                      |                                                                                                                                                               |                                                 |                                  |
| <u>Bacteroidales</u>                                                                                                                                                                  |                      |                                                                                                                                                               |                                                 |                                  |
| <i>Bacteroides pectinophilus</i>                                                                                                                                                      | ATCC 43243           | Human intestine (ϕ)                                                                                                                                           | EEC56840 (16)                                   | Glucosaminidase                  |
| <i>Bacteroides stercoris</i>                                                                                                                                                          | ATCC 43183           | Human intestine                                                                                                                                               | EDS16215 (17)                                   | NK                               |
| <i>Porphyromonas uenonis</i>                                                                                                                                                          | 60-3                 | Human intestine                                                                                                                                               | E EK16248 (18)                                  | NK                               |
| <i>Prevotella copri</i>                                                                                                                                                               | DSM 18205            | Human intestine                                                                                                                                               | EFB34745 (19)                                   | NK                               |
| <b>CHLOROFLEXI</b>                                                                                                                                                                    |                      |                                                                                                                                                               |                                                 |                                  |
| <u>'Dehalococcoidetes'</u>                                                                                                                                                            |                      |                                                                                                                                                               |                                                 |                                  |
| <i>'Dehalococcoides ethenogenes'</i>                                                                                                                                                  | 195                  | Mostly Gram-negative, filamentous bacteria with unusual cell envelopes<br>Chloroethene-respiring bacteria<br>Contaminated groundwater sites (ϕ)               | AAW39696 (20)                                   | Lysozyme + CHAP                  |
| <b>FIRMICUTES</b>                                                                                                                                                                     |                      |                                                                                                                                                               |                                                 |                                  |
| <u>Clostridiales</u>                                                                                                                                                                  |                      |                                                                                                                                                               |                                                 |                                  |
| Gram-positive bacteria with a low G+C content in their DNA                                                                                                                            |                      |                                                                                                                                                               |                                                 |                                  |
| This order is phenotypically, chemotaxonomically, physiologically and ecologically diverse. Contains both Gram-positive and Gram-negative organisms                                   |                      |                                                                                                                                                               |                                                 |                                  |
| <i>Anaerococcus hydrogenalis</i>                                                                                                                                                      | DSM 7454             | C, An, NSF. Vaginal discharges and ovarian abscesses (ϕ)                                                                                                      | EEB35354 (21)                                   | NAM-amidase (2)                  |
| <i>Anaerococcus lactolyticus</i>                                                                                                                                                      | ATCC 51172           | C, An, NSF. Vaginal discharges and ovarian abscesses (ϕ)                                                                                                      | EEI85350 (22)<br>EEI86118 (23)                  | Lysozyme<br>Gucosaminidase       |
| <i>Anaerococcus prevotii</i>                                                                                                                                                          | DSM 20548            | C, An, NSF. Vaginal discharges and ovarian, peritoneal and sacral abscesses                                                                                   | ACV28608 (24)                                   | Lysozyme                         |
| <i>Anaerococcus tetradius</i>                                                                                                                                                         | ATCC 35098           | C, An, NSF. Vaginal discharges and ovarian abscesses                                                                                                          | EEI83902 (25)                                   | Lysozyme                         |

|                                                             |             |                                                                                                                     |                |                                                               |
|-------------------------------------------------------------|-------------|---------------------------------------------------------------------------------------------------------------------|----------------|---------------------------------------------------------------|
| <i>Finegoldia magna</i>                                     | ATCC 53516  | C, An, NSF. Gastrointestinal and female genito-urinary tract. Causes endocarditis and other infections (φ)          | EEJ67759 (26)  | NAM-amidase (2)                                               |
| <i>Parvimonas micra</i>                                     | ATCC 33270  | C, An, NSF. Oral cavity and gastrointestinal and female genito-urinary tract. Endodontic abscesses                  | EDP23940 (27)  | NAM-amidase (5)                                               |
| <i>Anaerostipes caccae</i>                                  | DSM 14662   | Gram-variable, R, An, NSF. Human intestine (φ)                                                                      | EDR98670 (28)  | NAM-amidase (2)                                               |
| <i>Catonella morbi</i>                                      | ATCC 51271  | Gram-negative, R, An, NSF. Oral cavity. Endodontic infections (φ)                                                   | EEP22199 (29)  | CHAP                                                          |
|                                                             |             | (φ)                                                                                                                 | EEP22813 (30)  | CHAP                                                          |
|                                                             |             | (φ)                                                                                                                 | EEP22668 (31)  | Glucosaminidase + CHAP                                        |
| <i>Clostridium</i> sp.                                      | M62/1       | R, An, SF. Human intestine (φ)                                                                                      | EFE12573 (32)  | Lysozyme                                                      |
| <i>Clostridium asparagiforme</i>                            | DSM 15981   | R, An, SF. Human intestine (φ)                                                                                      | EEG51680 (33)  | NK                                                            |
| <i>Clostridium hathewayi</i>                                | DSM 13479   | R, An, SF. Human intestine                                                                                          | EFC95213 (34)  | CHAP                                                          |
| <i>Clostridium leptum</i>                                   | DSM 753     | R, An, SF. Human intestine                                                                                          | EDO61912 (35)  | NAM-amidase (2) + sporulation/cell division                   |
| <i>Coprococcus catus</i>                                    | GD/7        | C, An, NSF. Human intestine (φ)                                                                                     | CBK80688 (36)  | Lysozyme                                                      |
| <i>Coprococcus comes</i>                                    | ATCC 27758  | C, An, NSF. Human intestine (φ)                                                                                     | EEG89528 (37)  | NK                                                            |
|                                                             |             | (φ)                                                                                                                 | EEG89729 (38)  | Lysozyme                                                      |
| <i>Coprococcus eutactus</i>                                 | ATCC 27759  | C, An, NSF. Human intestine                                                                                         | EDP25145 (39)  | Lysozyme                                                      |
| <i>Ethanoligenens harbinense</i>                            | YUAN-3      | R, An, NSF. Wastewater (φ)                                                                                          | EFD38839 (40)  | Lysozyme                                                      |
| <i>Eubacterium rectale</i>                                  | ATCC 33656  | R, An, NSF. Human intestine (φ)                                                                                     | ACR75820 (41)  | Lysozyme                                                      |
| <i>Ruminococcus gnavus</i>                                  | ATCC 29149  | R, An, NSF. Human intestine (φ)                                                                                     | EDN76657 (42)  | Glucosaminidase + CHAP                                        |
|                                                             |             | (φ)                                                                                                                 | EDN79250 (43)  | Lysozyme                                                      |
|                                                             |             | (φ)                                                                                                                 | EDN79487 (44)  | NK                                                            |
| <i>Ruminococcus obeum</i>                                   | ATCC 29174  | C, An, NSF. Human intestine (φ)                                                                                     | EDM87532 (45)  | NK                                                            |
| <i>Ruminococcus torques</i>                                 | L2-14       | C, An, NSF. Human intestine (φ)                                                                                     | CBL24890 (46)  | Glucosaminidase                                               |
| <i>Clostridiales bacterium</i> sp.                          | SS3/4       |                                                                                                                     | CBL42507 (47)  | NAM-amidase (2) + Glucosaminidase + sporulation/cell division |
| <u><i>Erysipelotrichales</i></u>                            |             | Nonmotile, slender rods with a Gram-positive cell-wall structure. Aerobic to facultatively anaerobic                |                |                                                               |
| <i>Bulleidia extracta</i>                                   | W1219       | R, An, NSF. Oral cavity. Dental abscesses (φ)                                                                       | EFC05584 (48)  | Lysozyme                                                      |
| <i>Erysipelothricaceae bacterium</i>                        | 5_2_54FAA   | Human microbioma (φ)                                                                                                | EFE46538 (49)  | NAM-amidase (2)                                               |
| <u><i>Lactobacillales</i></u>                               |             | Gram-positive rods and cocci. Endospores are not formed. Usually facultatively anaerobic and catalase-negative      |                |                                                               |
| <i>Granulicatella elegans</i>                               | ATCC 700633 | R, An, NSF. Oral cavity. Endocarditis (φ)                                                                           | EEW92387 (50)  | NAM-amidase (2)                                               |
| <i>Lactobacillus antri</i>                                  | DSM 16041   | R, M, NSF. Human stomach mucosa (φ)                                                                                 | EEW53895 (51)  | Lysozyme                                                      |
| <i>Lactobacillus gasseri</i>                                | ATCC 33323  | R, An, NSF. Human intestine (φ)                                                                                     | ABJ60844 (52)  | Lysozyme                                                      |
|                                                             | 202-4       |                                                                                                                     | EEQ25513       |                                                               |
| <i>Lactobacillus reuteri</i>                                | SD2112      | R, An, NSF. Human intestine (φ)                                                                                     | EEJ91939 (53)  | NK                                                            |
|                                                             | CF48-3A     |                                                                                                                     | EET65431       |                                                               |
| <i>Lactococcus lactis</i> subsp. <i>lactis</i>              | IL1403      | C, A, NSF. Dairy products (φ)                                                                                       | AAK05760 (54)  | Transglycosylase                                              |
|                                                             | KF147       | C, A, NSF. Plant material (φ)                                                                                       | ADA65407 (55)  | Transglycosylase                                              |
| <i>Lactococcus lactis</i> subsp. <i>cremoris</i>            | SK11        | C, A, NSF. Dairy products (φ)                                                                                       | ABJ73318 (56)  | Transglycosylase                                              |
|                                                             | MG1363      | C, A, NSF. Dairy products (φ)                                                                                       | CAL97364 (57)  | Transglycosylase                                              |
| <i>Streptococcus dysgalactiae</i> subsp. <i>equisimilis</i> | GGs_124     | C, FA, NSF. Respiratory tract and female genito-urinary tract. Pharyngitis, glomerulonephritis, and septicemia. (φ) | BAH82103 (58)  | NAM-amidase (5) + glucosaminidase                             |
| <u><i>Phages</i></u>                                        |             |                                                                                                                     |                |                                                               |
| <i>Cp-7</i> ( <i>S. pneumoniae</i> )                        |             | Lytic phage                                                                                                         | AAA72844 (59φ) | Lysozyme                                                      |

|                                                                             |             |                                               |                                                |
|-----------------------------------------------------------------------------|-------------|-----------------------------------------------|------------------------------------------------|
| $\lambda$ Sa2 prophage ( <i>S. agalactiae</i> 2603 V/R)                     | Prophage    | AAN00700 (60 $\phi$ )                         | NAM-amidase (5) <sup>e</sup> + glucosaminidase |
| $\phi$ 10750.3 prophage ( <i>S. pyogenes</i> MGAS10750)                     | Prophage    | ABF38229 (61 $\phi$ )                         | NAM-amidase (5) + glucosaminidase              |
| $\phi$ SpeA prophage ( <i>S. pyogenes</i> MGAS8232)                         | Prophage    | AAL97140 (62 $\phi$ )                         | NAM-amidase (5) + glucosaminidase              |
| $\phi$ 315.3/SPsP4/M1T1.Y prophage ( <i>S. pyogenes</i> MGAS315/SSI-1/M1T1) | Prophage    | AAM79703 (63 $\phi$ )<br>BAC63864<br>AAX92493 | NAM-amidase (5) + glucosaminidase              |
| $\phi$ Man.2 prophage ( <i>S. pyogenes</i> Manfredo)                        | Prophage    | CAM30020 (64 $\phi$ )                         | NAM-amidase (5) + glucosaminidase              |
| SMP ( <i>S. suis</i> )                                                      | Lytic phage | ABK91888 (65 $\phi$ )                         | NAM-amidase (5) + glucosaminidase              |
| Bbr-1 prophage ( <i>Bifidobacterium breve</i> UCC 2003)                     | Prophage    | AAY16487 (66 $\phi$ )                         | NK                                             |
| KSY1 ( <i>L. lactis</i> )                                                   | Lytic phage | ABG21617 (67 $\phi$ )                         | Transglycosylase                               |

<sup>a</sup> Phyla (in uppercase lettering), order (italicized and underlined), and species names were assigned following current rules (1) as well as the Euzéby's List of Prokaryotic Names with Standing in Nomenclature (<http://www.bacterio.cict.fr/>). Quotation marks indicate taxonomic categories not covered by the Rules of the Bacteriological Code.

<sup>b</sup> Relevant characteristics are abbreviated as follows: A, aerobic; An, anaerobic, C, coccus; FA, facultative anaerobic; M, microaerophilic; NSF, non-spore-forming; R, rod; SF, spore-forming.  $\phi$  indicates the presence of a holin-like coding gene (or other phage-related genes) located immediately upstream of that encoding a protein containing CW\_7 repeats. This finding was considered as an indication of phage origin.

<sup>c</sup> Accession numbers correspond to those included in the Entrez Protein Database of the National Center for Biotechnological Information (<http://www.ncbi.nlm.nih.gov/>). Numbers in parentheses correspond to those of Fig. 1.

<sup>d</sup> Proposed functions according with the Pfam protein family database (version 24.0). NK, not known.

<sup>e</sup>  $\gamma$ -D-glutaminyL-L-lysine endopeptidase activity has been demonstrated for the *Amidase\_5* motif of the  $\lambda$ Sa2 prophage (2).

## REFERENCES

1. Euzéby, J. (2010) *Int. J. Syst. Evol. Microbiol.* **60**, 469–4721
2. Pritchard, D. G., Dong, S., Kirk, M. C., Cartee, R. T., and Baker, J. R. (2007) *Appl. Environ. Microbiol.* **73**, 7150-7154

## Legend for Supplemental Figures

**Figure S1** – Helical wheel diagram of the three  $\alpha$ -helices predicted for each CW\_7 repeat. The first residue in the wheels is numbered according to the third Cpl-7 repeat (Thr302, Gln317 and Pro330); hydrophobic residues at the internal faces are filled in gray. Dotted circles are unoccupied positions in the wheel.

**Figure S2** – *A*, Guinier plot of SAXS data. *B*, extended plot of the  $P(r)$  function. *C*, fit of the Fourier transform of the  $P(r)$  function to SAXS data. *D*, fit of theoretical scattering profile of the *ab initio* model of Cpl-7 generated by DALAI-GA to the SAXS data at low values of the scattering vector ( $s$ ).

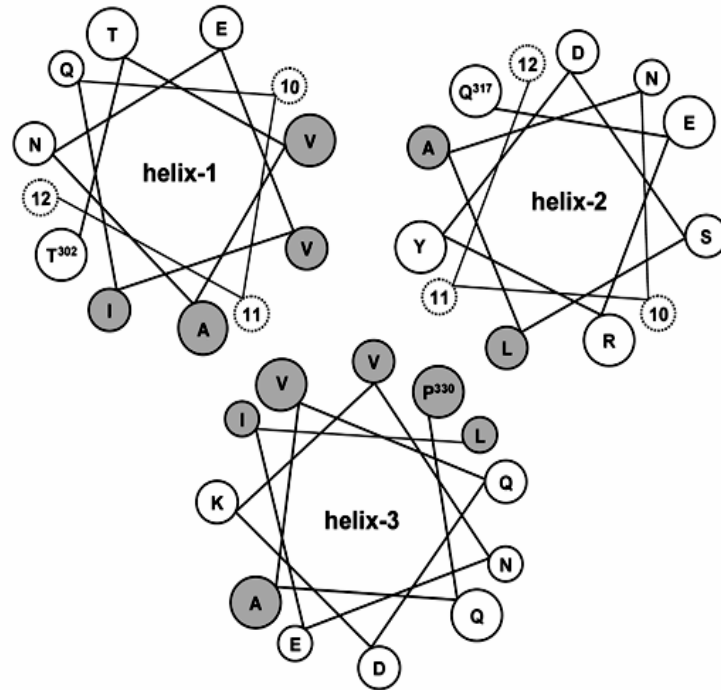

*Bustamante et al.* Supplementary Fig. S1

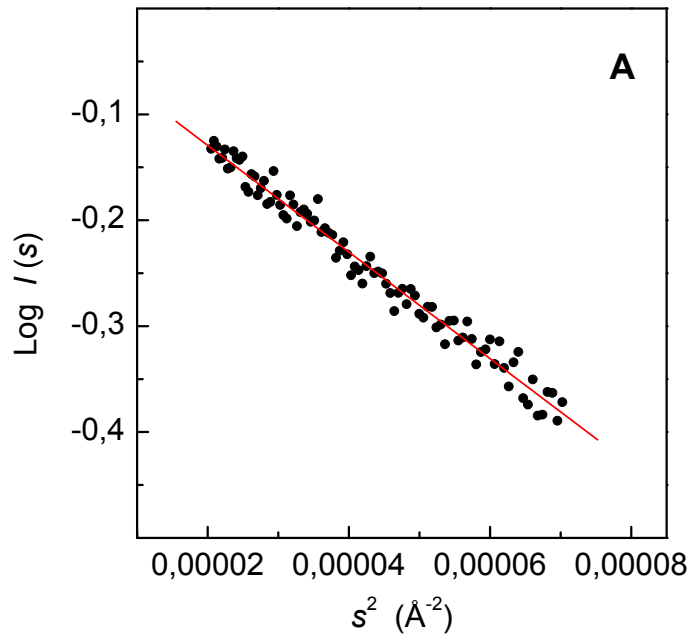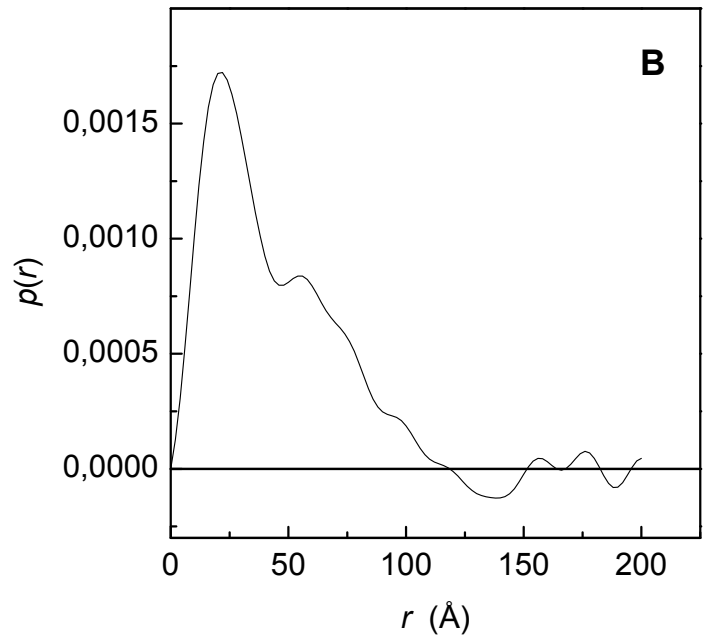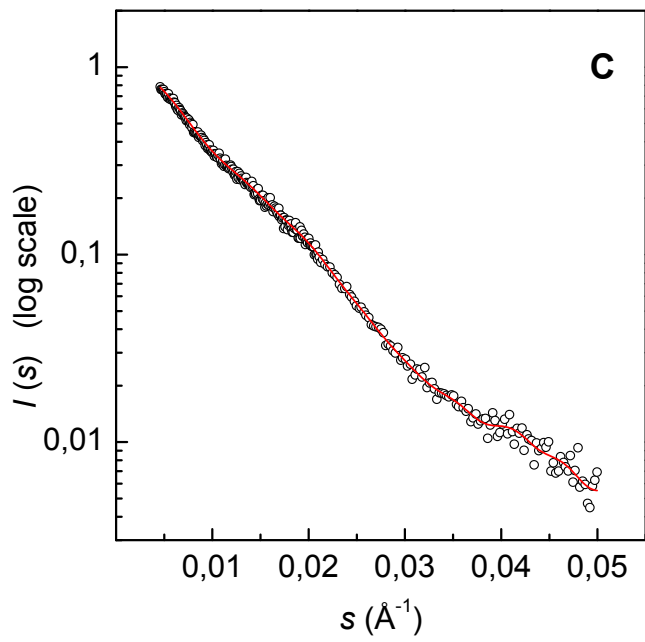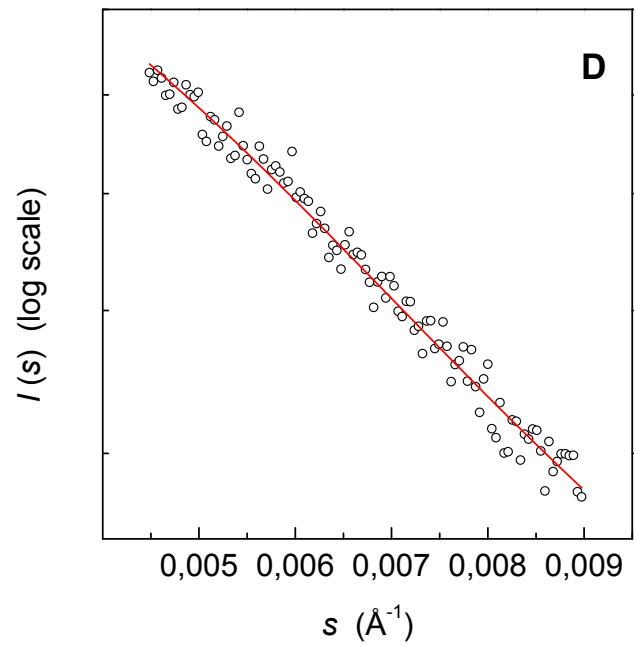

Supplement: supp_M110.154559_Supplementary.pdf [file supp_M110.154559_Supplementary.pdf]
